# Supplementary material
Source: publisher figshare collection journal article supplement (https://frontiersin.figshare.com/ndownloader/files/25628126)

**APPENDIX 6.** Numbers and percentages of suspected microplastics identified in 138 Olympic Coast razor clam samples (n=799) by color. Colors in figure correspond to actual colors encountered: colorless (n= 441; 55.19%), blue (n=154; 19.27%), gray (n=98; 12.27%), black (n=37; 4.63%), red (n=26; 3.25%), purple (n=19; 2.38%), brown (n=15; 1.88%), green (n=5; 0.63%), and pink (n=4; 0.50%).

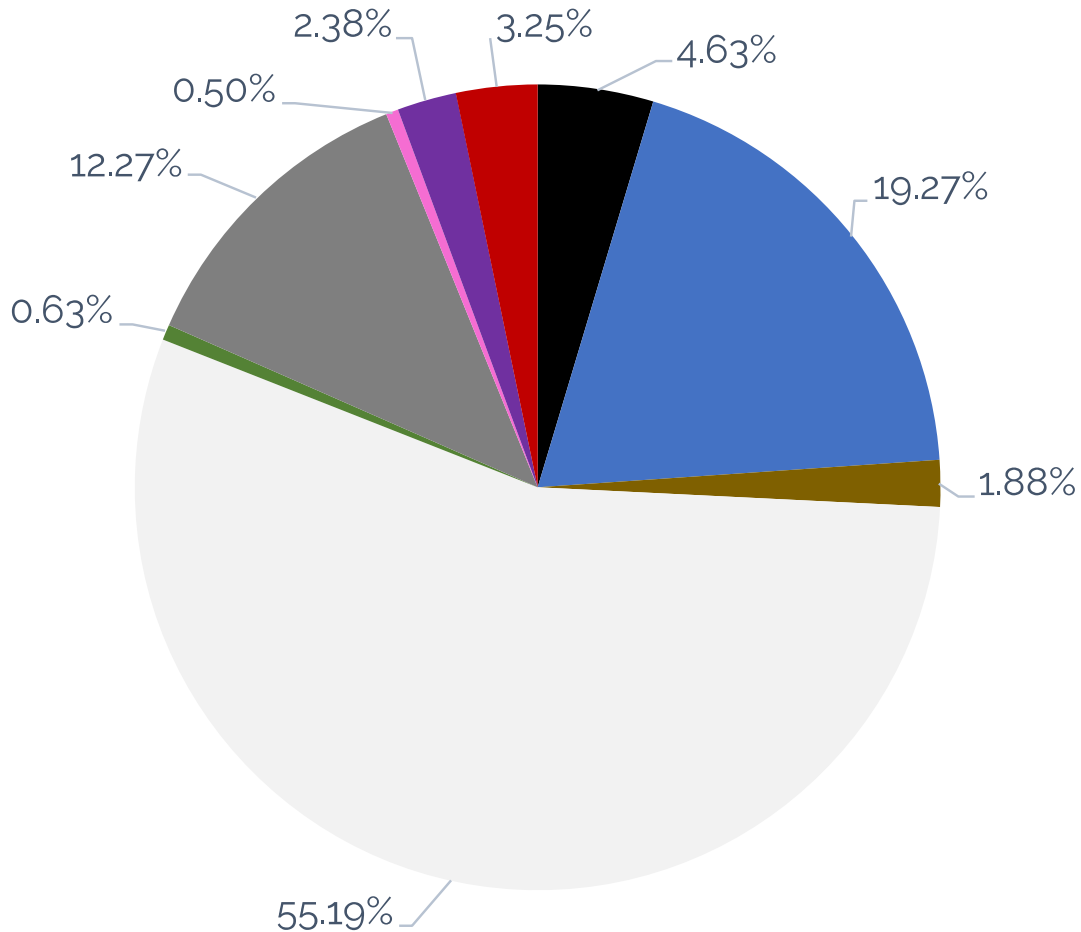

Supplement: Supplementary file 1 [file 25628126]
